# Supplementary material for: NCOA7 Regulates Growth and Metastasis of Clear Cell Renal Cell Carcinoma via MAPK/ERK Signaling Pathway
Source: MDPI journal article supplement (doi:10.3390/ijms241411584), 2023-07-18
Supplement: s1 [file s1]

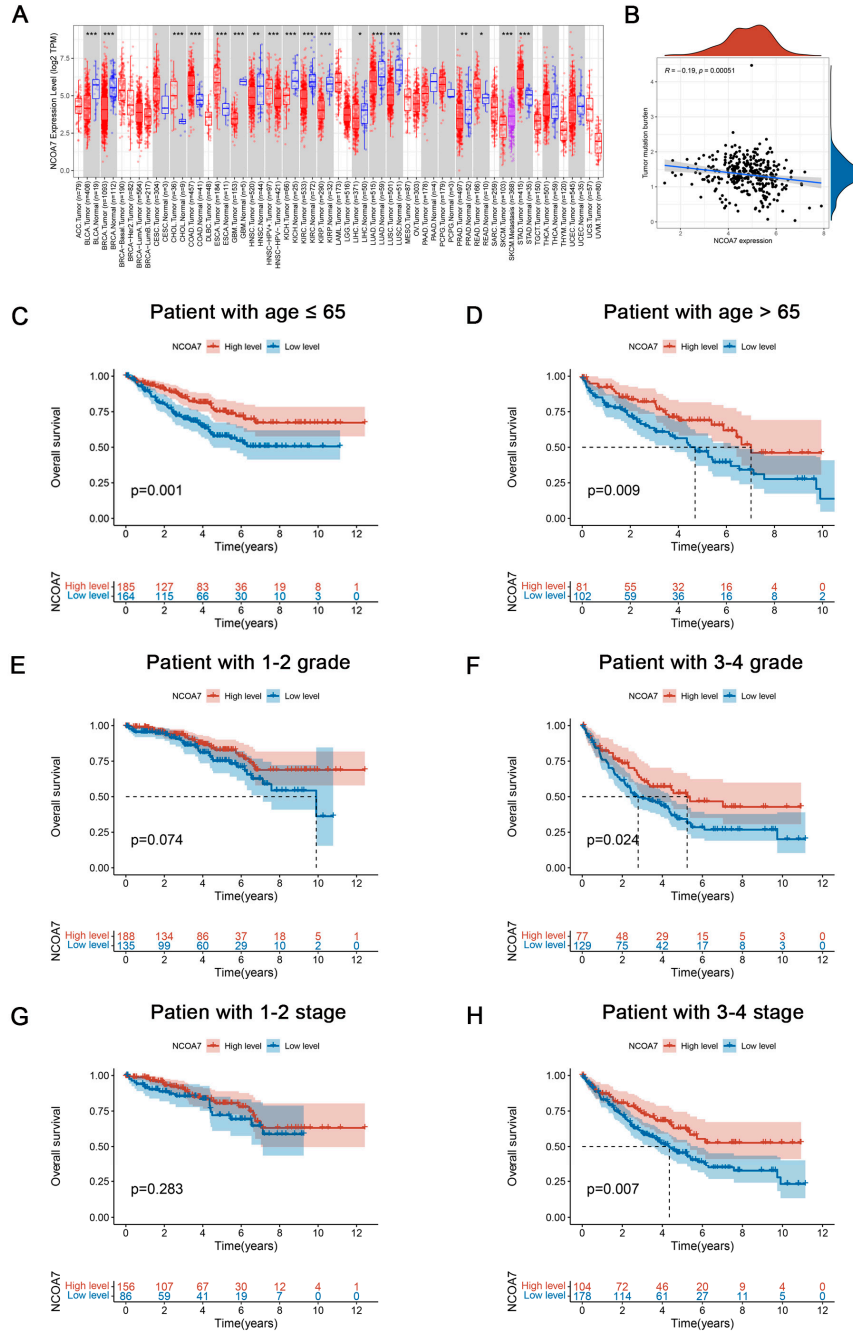

**Figure S1.** Pan-carcinoma expression of NCOA7, and the effect of NCOA7 on the survival of ccRCC patients with different ages, grades, and stages. (A) The expression profile of NCOA7 across all tumor samples and normal tissues. (B) Correlation of NCOA7 expression with tumor mutational burden. (C-H) Overall survival curve of ccRCC patients with low and high NCOA7 expression at  $\leq 65$  years (C),  $> 65$  years (D), 1–2 grade (E), 3–4 grade (F), 1–2 stage (G), and 3–4 (H), respectively. \*  $p < 0.05$ , \*\*  $p < 0.01$ , \*\*\*  $p < 0.001$ .
